# Supplementary material for: Molecular identification of individual and seasonal variation in incidental ingestion of arthropods by free-ranging goats
Source: Frontiers journal article supplement (doi:10.3389/fevo.2022.1070088), 2023-01-11
Supplement: Table_1.XLSX [file Table_1.XLSX]

## Sheet: Sheet1
Dataset S1. Description of samples, treatments and the study site
Green fill	Samples used in analysis
No fill	Samples removed from analysis
Sample number	Sample name	Sample type	Date of collection	Goat ID
1	G2	Goat feces	2019-02-03	1147
2	G4	Goat feces	2019-02-03	1717
3	G10	Goat feces	2019-02-03	1055
4	G11	Goat feces	2019-02-03	1907
5	G12	Goat feces	2019-02-03	1825
6	G13	Goat feces	2019-02-03	1579
7	G14	Goat feces	2019-02-03	1171
8	G17	Goat feces	2019-02-03	1332
9	G20	Goat feces	2019-02-03	1942
10	G24	Goat feces	2019-03-03	1717
11	G28	Goat feces	2019-03-03	1632
12	G29	Goat feces	2019-03-03	2034
13	G30	Goat feces	2019-03-03	1942
14	G31	Goat feces	2019-03-03	1907
15	G32	Goat feces	2019-03-03	1825
16	G34	Goat feces	2019-03-03	1171
17	G36	Goat feces	2019-03-03	2042
18	G39	Goat feces	2019-03-03	1130
19	G40	Goat feces	2019-03-03	1055
20	G42	Goat feces	2019-04-02	1147
21	G43	Goat feces	2019-04-02	1619
22	G44	Goat feces	2019-04-02	1717
23	G45	Goat feces	2019-04-02	1074
24	G47	Goat feces	2019-04-02	2473
25	G50	Goat feces	2019-04-02	1942
26	G51	Goat feces	2019-04-02	1907
27	G52	Goat feces	2019-04-02	1825
28	G53	Goat feces	2019-04-02	1579
29	G56	Goat feces	2019-04-02	2042
30	G57	Goat feces	2019-04-02	1332
31	G59	Goat feces	2019-04-02	1130
32	G60	Goat feces	2019-04-02	1055
33	G61	Goat feces	2019-05-06	2111
34	G63	Goat feces	2019-05-06	1619
35	G64	Goat feces	2019-05-06	1717
36	G65	Goat feces	2019-05-06	1074
37	G67	Goat feces	2019-05-06	2473
38	G68	Goat feces	2019-05-06	1632
39	G70	Goat feces	2019-05-06	1055
40	G71	Goat feces	2019-05-06	1907
41	G72	Goat feces	2019-05-06	1825
42	G73	Goat feces	2019-05-06	1579
43	G77	Goat feces	2019-05-06	1332
44	G78	Goat feces	2019-05-06	1661
45	G79	Goat feces	2019-05-06	1130
46	G81	Goat feces	2019-06-06	2111
47	G82	Goat feces	2019-06-06	1147
48	G83	Goat feces	2019-06-06	1619
49	G84	Goat feces	2019-06-06	1717
50	G89	Goat feces	2019-06-06	2034
51	G90	Goat feces	2019-06-06	1055
52	G91	Goat feces	2019-06-06	1907
53	G92	Goat feces	2019-06-06	1825
54	G94	Goat feces	2019-06-06	1171
55	G97	Goat feces	2019-06-06	1332
56	G98	Goat feces	2019-06-06	1661
57	G100	Goat feces	2019-06-06	1942
58	G1	Goat feces	2019-02-03	2111
59	G3	Goat feces	2019-02-03	1619
60	G7	Goat feces	2019-02-03	2473
61	G8	Goat feces	2019-02-03	1632
62	G9	Goat feces	2019-02-03	2034
63	G16	Goat feces	2019-02-03	2042
64	G18	Goat feces	2019-02-03	1661
65	G22	Goat feces	2019-03-03	1147
66	G23	Goat feces	2019-03-03	1619
67	G25	Goat feces	2019-03-03	1074
68	G27	Goat feces	2019-03-03	2473
69	G33	Goat feces	2019-03-03	1579
70	G41	Goat feces	2019-04-02	2111
71	G48	Goat feces	2019-04-02	1632
72	G49	Goat feces	2019-04-02	2034
73	G54	Goat feces	2019-04-02	1171
74	G62	Goat feces	2019-05-06	1147
75	G69	Goat feces	2019-05-06	2034
76	G74	Goat feces	2019-05-06	1171
77	G76	Goat feces	2019-05-06	2024
78	G80	Goat feces	2019-05-06	1942
79	G88	Goat feces	2019-06-06	1632
